# Supplementary material for: Oral Cooling and Carbonation Increase the Perception of Drinking and Thirst Quenching in Thirsty Adults
Source: PLOS journal article supplement (doi:10.1371/journal.pone.0162261), 2016-09-29

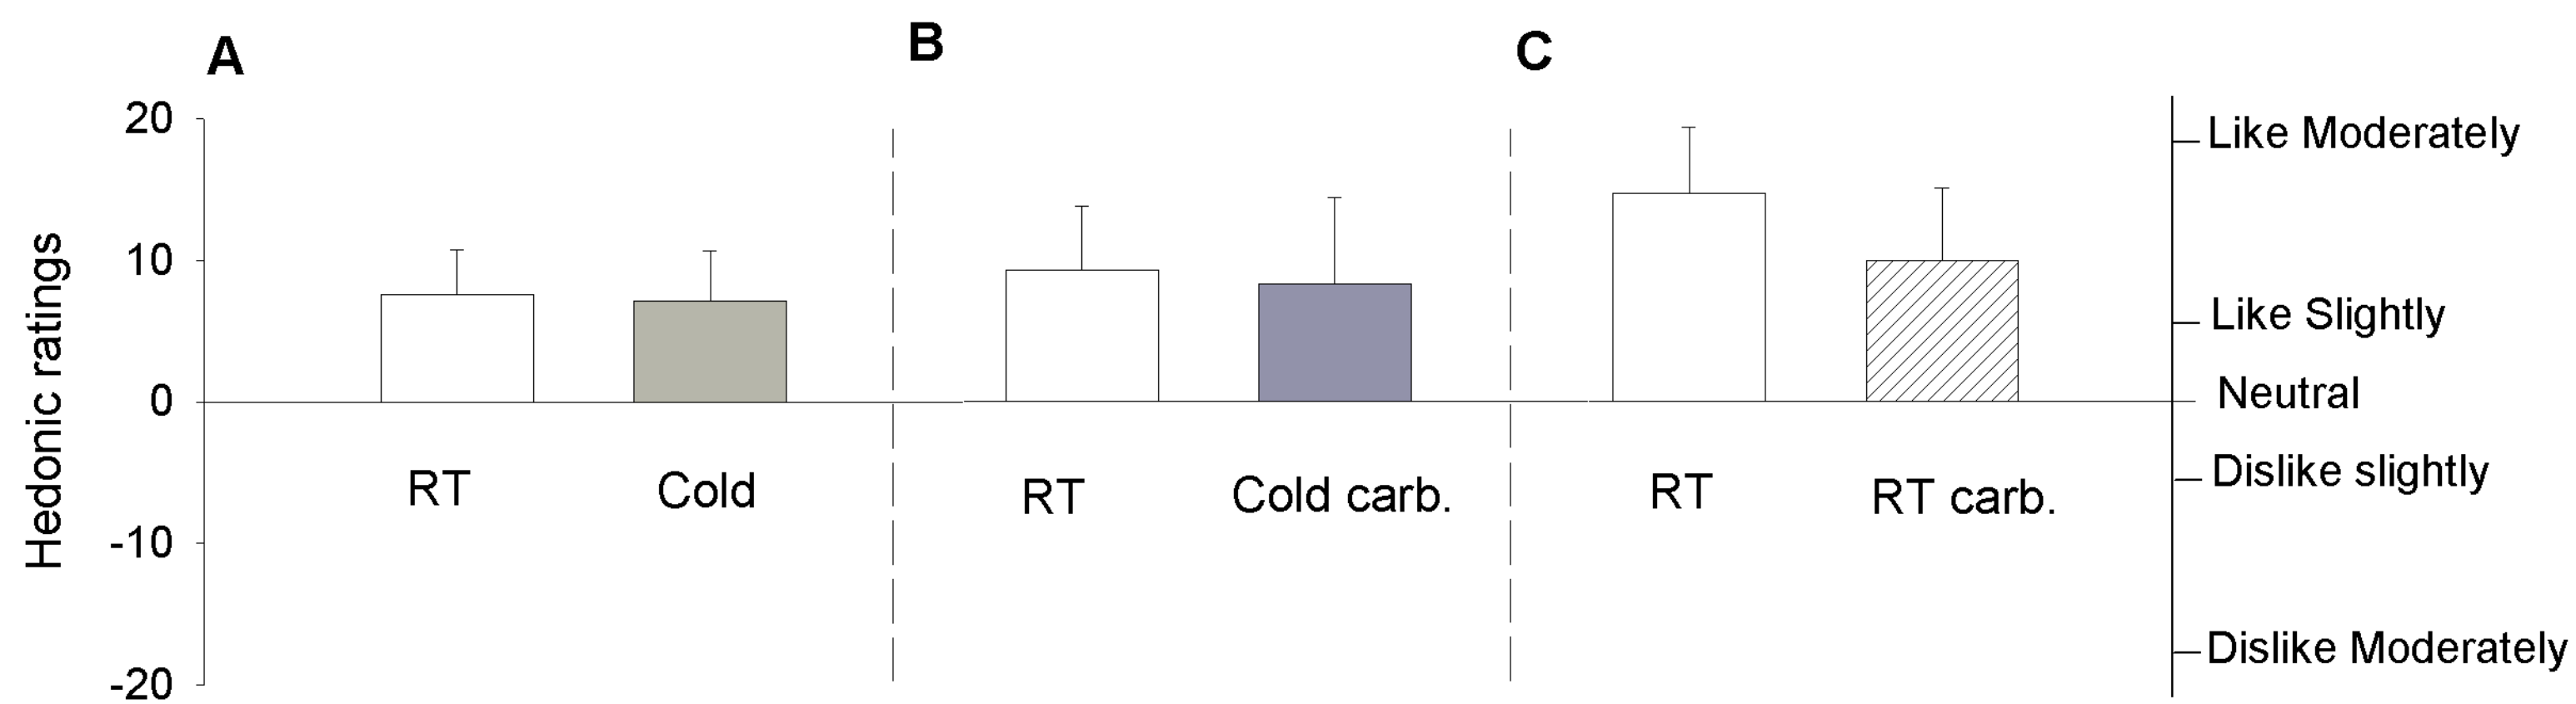

Supplement: S1 (10.1371/journal.pone.0162261.s001) [file journal.pone.0162261.s001]
